# Supplementary material for: Trends in eastern China agricultural fire emissions derived from a combination of geostationary (Himawari) and polar (VIIRS) orbiter fire radiative power products
Source: Copernicus journal article supplement (doi:10.5194/acp-20-10687-2020), 2020-09-11
Supplement: Supplementary file [file acp-20-10687-2020-supplement.pdf]

Supplement of Atmos. Chem. Phys., 20, 10687–10705, 2020  
<https://doi.org/10.5194/acp-20-10687-2020-supplement>  
© Author(s) 2020. This work is distributed under  
the Creative Commons Attribution 4.0 License.

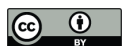

*Supplement of*

**Trends in eastern China agricultural fire emissions derived from a combination of geostationary (Himawari) and polar (VIIRS) orbiter fire radiative power products**

**Tianran Zhang et al.**

*Correspondence to:* Tianran Zhang (tianran.zhang@kcl.ac.uk)

The copyright of individual parts of the supplement might differ from the CC BY 4.0 License.

## Supplement

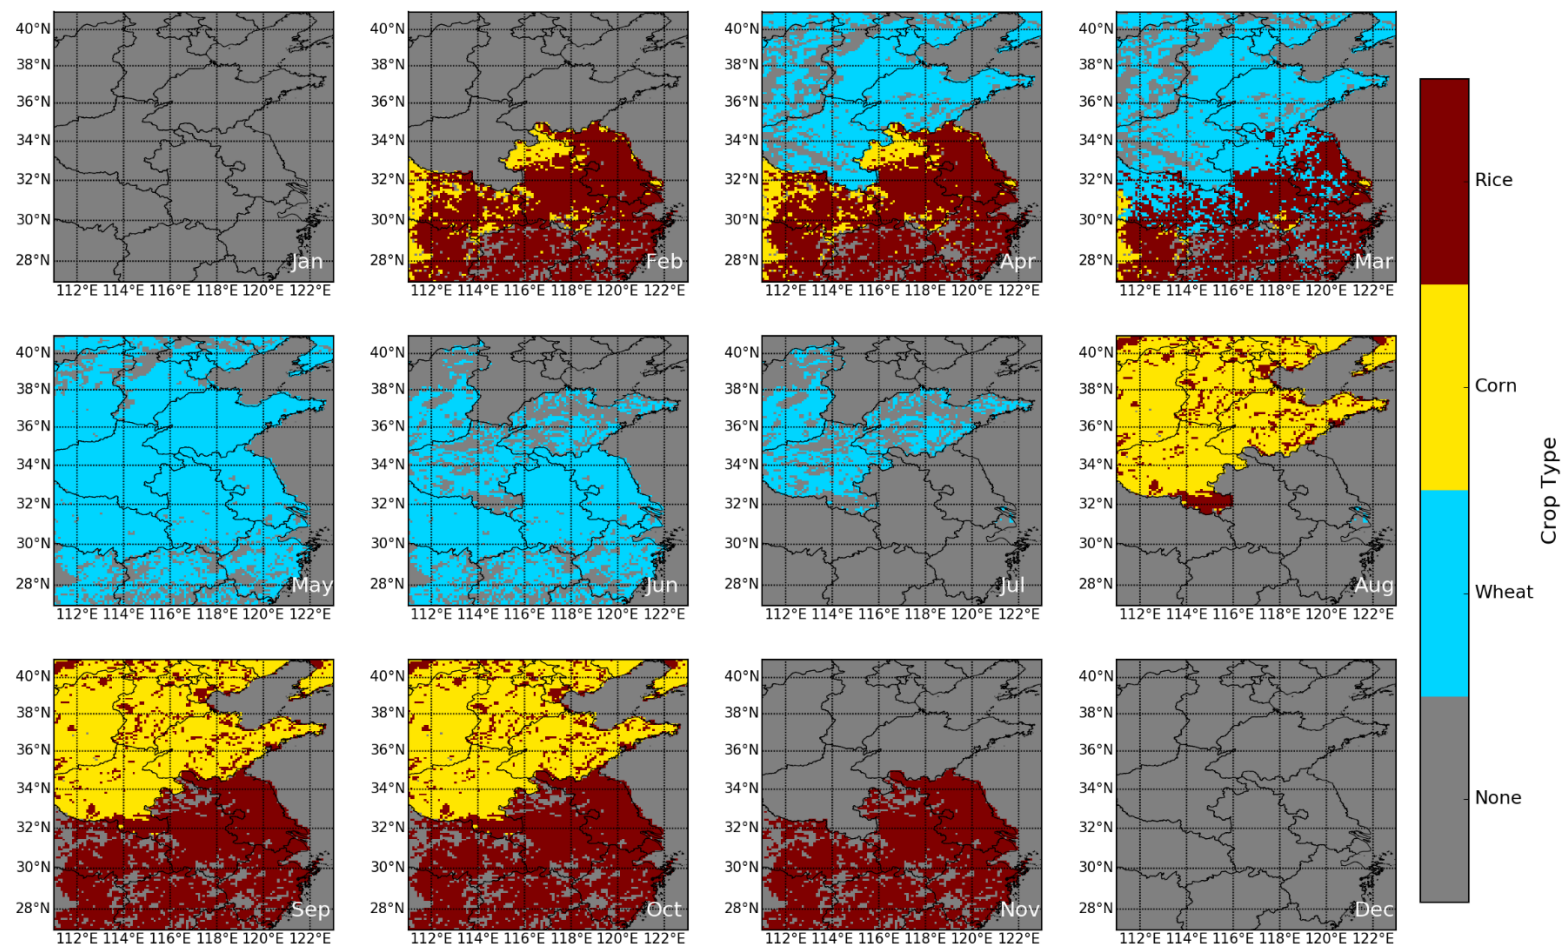

**Figure S1:** Monthly crop rotation map ( $0.1 \times 0.1^\circ$  grid cells) of eastern China generated from the MIRCA2000 rotation cultivation dataset (Portmann et al., 2010). These data were used to both identify the fuel type of each grid cell in which there were fires and to apply the correct emission factor from Table 1. The basic layer of country/province borders within this map was created using Python Basemap library.

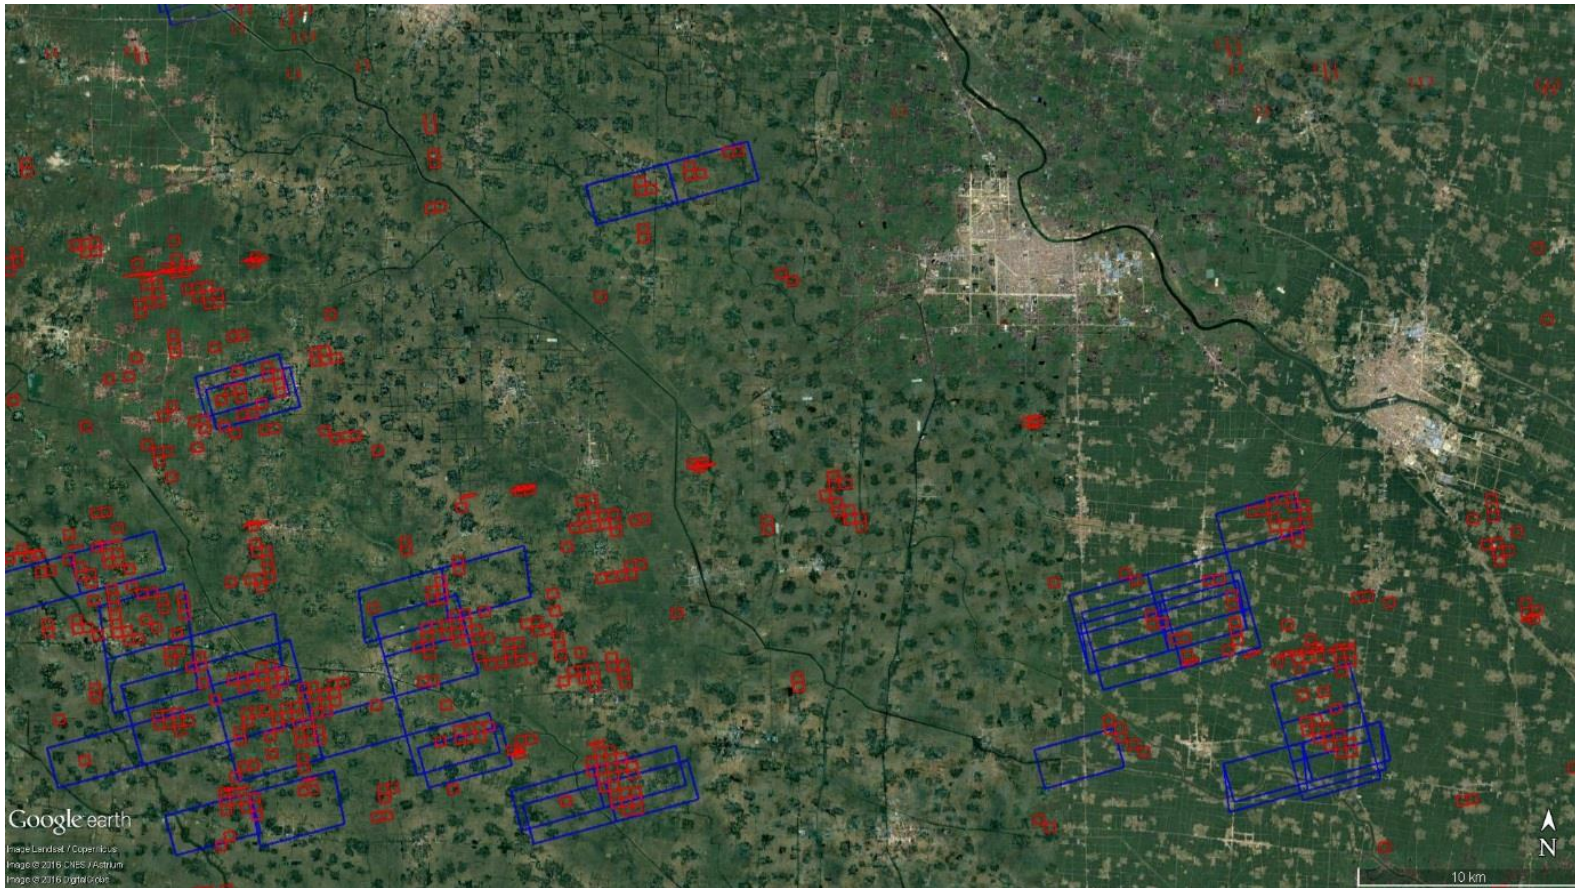

**Figure S2:** VIIRS (red) and MODIS (blue) fire pixel footprints overlaying Google Earth imagery (June 11th, 2015, © Google Earth). This particular day (11th June) shows unusually high FRP fires for this region, responsible for 62 % of the total VIIRS-IM FRP of the whole of June 2015 (Zhang et al., 2017). The areas of intensive burning area on that day were mainly located towards the edge of swath of for MODIS, but were so large/strongly burning that MODIS could still detect them at these high scan angles. Strong line-to-line duplication of the MODIS pixels shown in this figure have increased the FRP beyond what it would have been were these fires located at nadir, and as a result, likely caused a 1-2x overestimation in MODIS FRP retrieval.

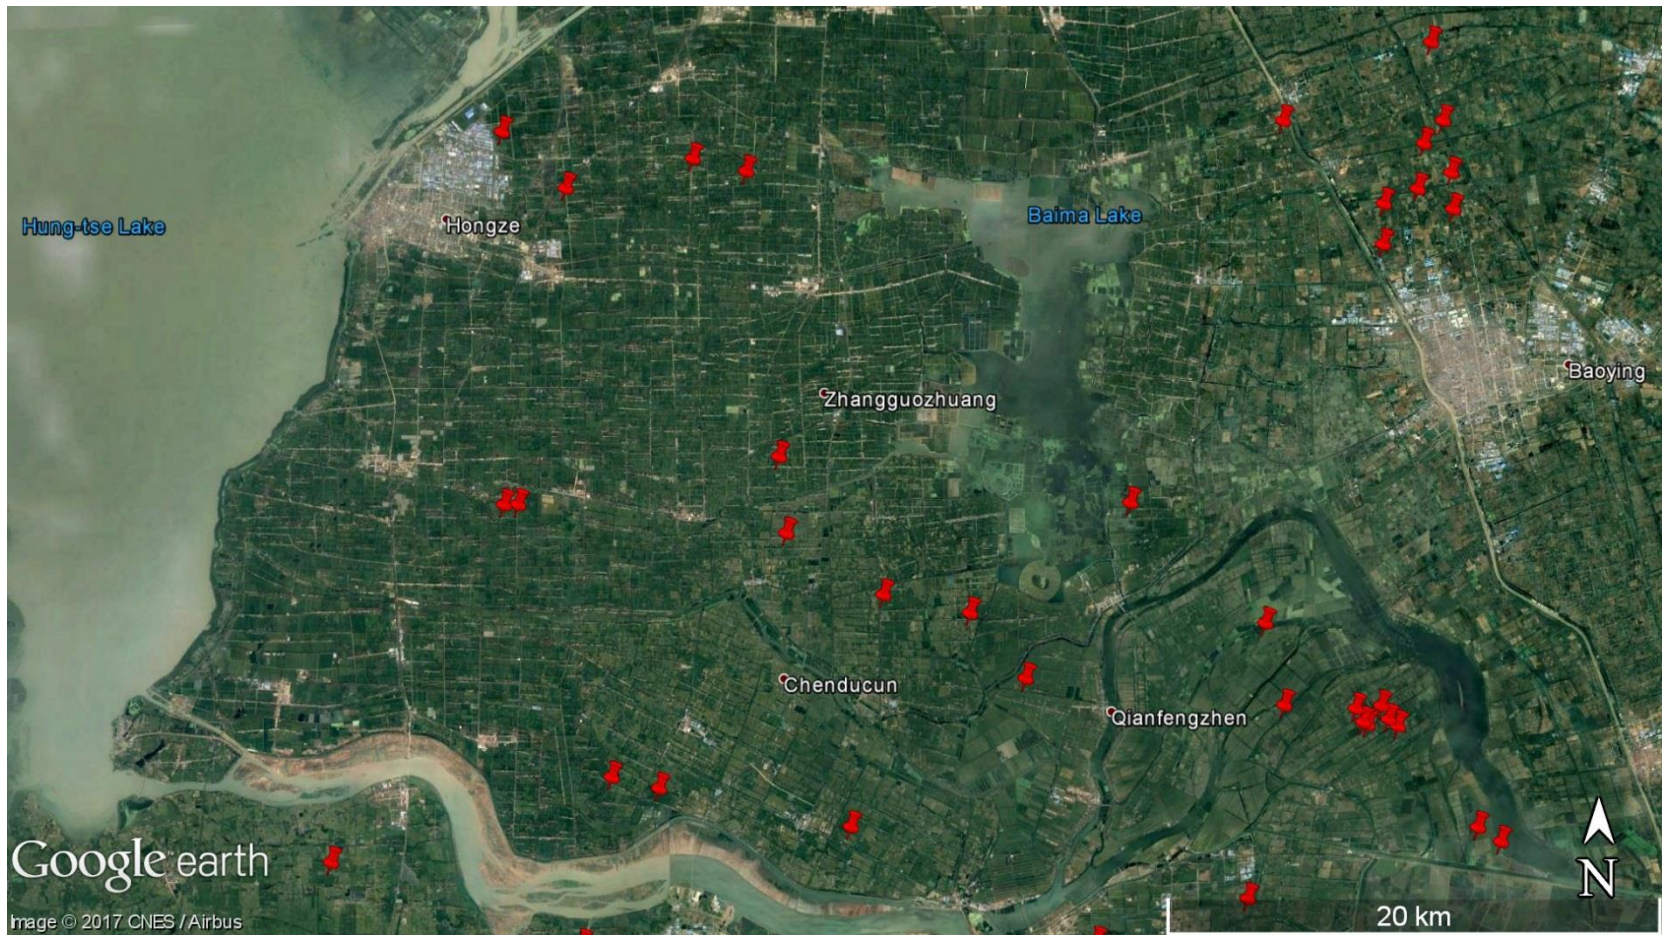

**Figure S3:** Google Earth imagery (centred at 33.210°N, 119.043°E, © Google Earth) upon which are superimposed the VIIRS active fire pixels (red pin, fire detection algorithm details seen in Section 3.2) from Nov. 20<sup>th</sup> to Dec. 10<sup>th</sup>, 2013. The majority of these fire detections are located in agricultural areas, and do not appear to be false alarms (see Section 5.2 for further details)

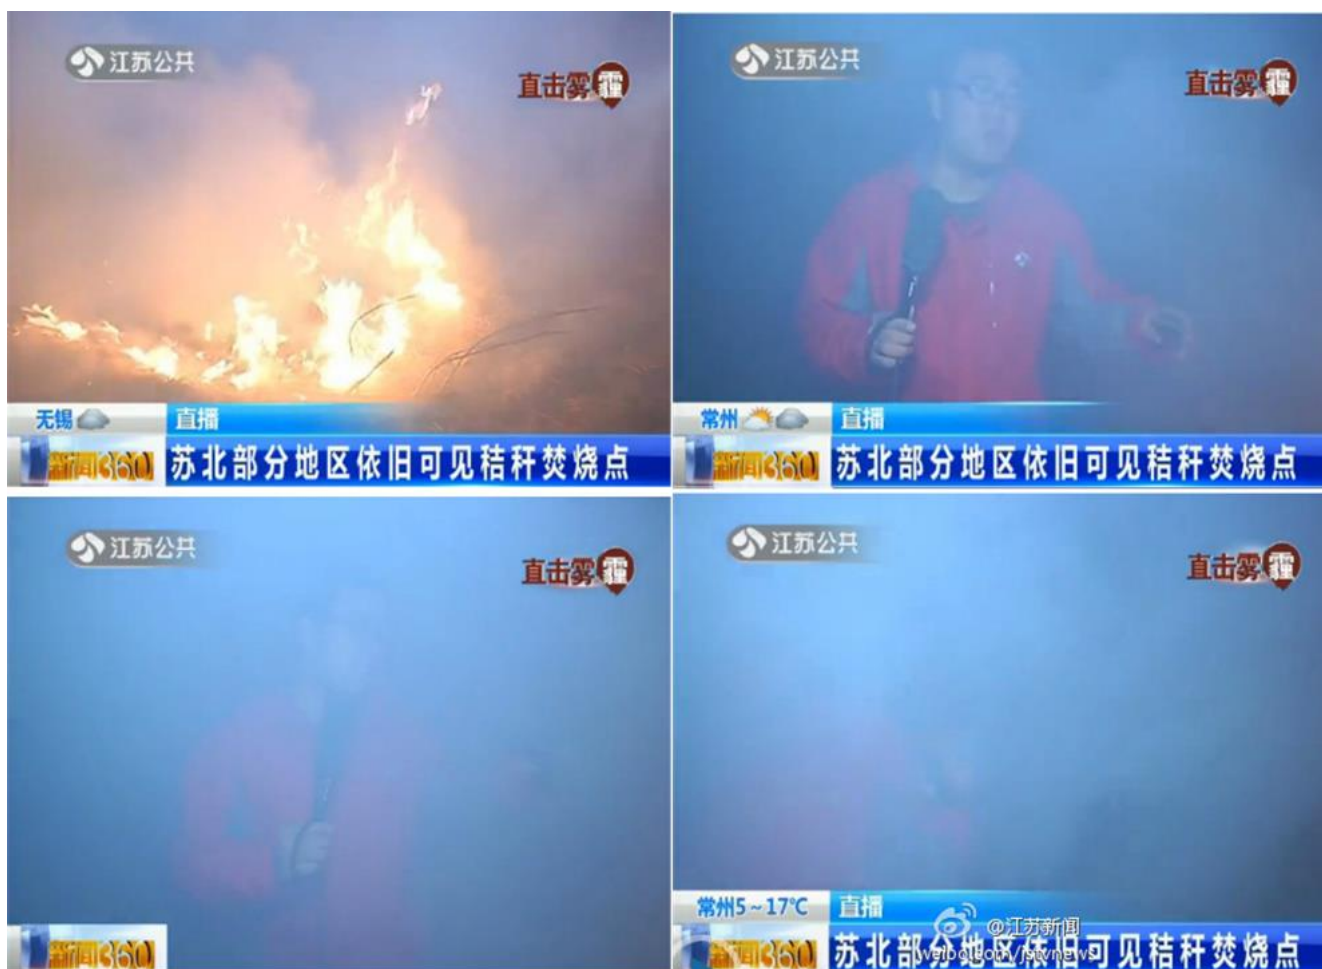

**Figure S4:** Evidence for agricultural burning in the winter season (2013). During a live TV news report related to intensive burning of agricultural residues in Hongze, Jiangsu Province ( $33.2942^{\circ}$  N,  $118.8731^{\circ}$  E) on 5<sup>th</sup> December 2013, the reporter disappears into the thick smoke ([http://www.weibo.com/1301904252/A1Vcm8jZ2?type=comment#\\_rnd1499031542147](http://www.weibo.com/1301904252/A1Vcm8jZ2?type=comment#_rnd1499031542147)).

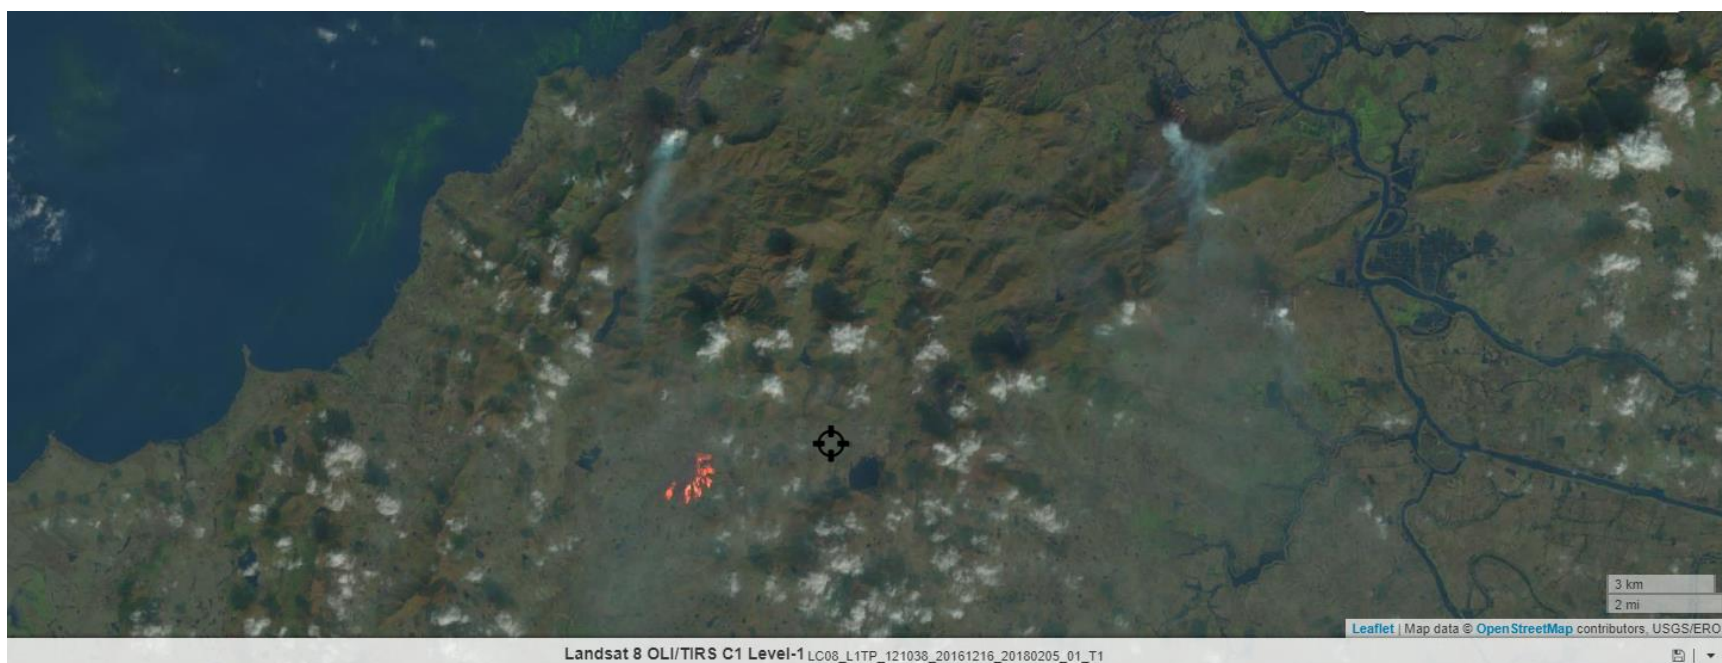

Figure S5. Landsat true colour imagery shows fires over agricultural land on Dec 16<sup>th</sup>, 2016 near Wuhu City, Anhui (31.429309°N, 117.719021°E). The imagery was taken from USGS/EROS website.

**Table S1:** Province-specific crop yield of three main grains in Eastern China ( $\times 10^1$  Gg, National Bureau of Statistics of China, 2012-2015)

| Province | 2012  |      |       | 2013  |      |       | 2014  |      |       | 2015  |      |       |
|----------|-------|------|-------|-------|------|-------|-------|------|-------|-------|------|-------|
|          | Wheat | Corn | Rice  | Wheat | Corn | Rice  | Wheat | Corn | Rice  | Wheat | Corn | Rice  |
| Shanghai | 24    | 3    | 89    | 23    | 3    | 89    | 18    | 3    | 87    | 19    | 3    | 84    |
| Beijing  | 28    | 90   | 0     | 27    | 84   | 0     | 19    | 75   | 0     | 12    | 50   | 0     |
| Tianjin  | 54    | 94   | 11    | 56    | 93   | 11    | 57    | 102  | 13    | 59    | 101  | 12    |
| Anhui    | 1216  | 363  | 1387  | 1294  | 428  | 1394  | 1332  | 426  | 1362  | 1394  | 466  | 1395  |
| Shandong | 2104  | 1979 | 104   | 2180  | 1995 | 103   | 2219  | 1967 | 104   | 2264  | 1988 | 101   |
| Shanxi   | 240   | 855  | 1     | 259   | 904  | 1     | 231   | 956  | 1     | 259   | 938  | 1     |
| Jiangsu  | 1023  | 226  | 1864  | 1049  | 230  | 1900  | 1101  | 216  | 1922  | 1160  | 239  | 1912  |
| Jiangxi  | 2     | 11   | 1950  | 2     | 13   | 1976  | 3     | 12   | 2004  | 3     | 12   | 2025  |
| Hebei    | 1276  | 1640 | 60    | 1338  | 1650 | 50    | 1387  | 1704 | 59    | 1430  | 1671 | 54    |
| Henan    | 3123  | 1697 | 475   | 3177  | 1748 | 493   | 3226  | 1797 | 486   | 3329  | 1732 | 529   |
| Zhejiang | 27    | 15   | 649   | 27    | 29   | 608   | 28    | 27   | 580   | 31    | 30   | 590   |
| Hubei    | 345   | 276  | 1617  | 371   | 283  | 1651  | 417   | 271  | 1677  | 422   | 294  | 1730  |
| Hunan    | 10    | 189  | 2575  | 9     | 197  | 2632  | 11    | 185  | 2562  | 10    | 189  | 2634  |
| Total    | 9472  | 7438 | 10782 | 9812  | 7657 | 10908 | 10049 | 7741 | 10857 | 10392 | 7713 | 11067 |

**Table S2:** Proportion of dry matter production-to-residue ratios ( $R_i$ ) and crop combustion completeness ( $C$ , de Zarate *et al.*, 2010; Huang *et al.*, 2012; Turn *et al.*, 1997; Wang and Zhang, 2008) from burning of wheat, corn and rice residues. Combustion completeness is high for fine fuels such as these.

|       | Production-to-residue Ratio | Combustion Completeness |
|-------|-----------------------------|-------------------------|
| Wheat | 1.0                         | 0.86                    |
| Corn  | 2.0                         | 0.92                    |
| Rice  | 1.0                         | 0.89                    |
